# Supplementary material for: Evolutionary History and Ongoing Transmission of Phylogenetic Sublineages of Mycobacterium tuberculosis Beijing Genotype in China
Source: PubMed Central journal article supplement (PMC5041183; doi:10.1038/srep34353), 2016-09-29

## Evolutionary History and Ongoing Transmission of Phylogenetic Sublineages of *Mycobacterium tuberculosis* Beijing Genotype in China

Qing-qin Yin, Hai-can Liu, Wei-wei Jiao, Qin-jing Li, Rui Han, Jian-ling Tian, Zhi-guang Liu, Xiu-qin Zhao, Ying-jia Li, Kang-lin Wan, A-dong Shen, Igor Mokrousov

**Supplementary Table S2.** Genetic diversity of local *M. tuberculosis* Beijing genotype populations.

| Province, region | H, mean diversity of 24 loci | N, number of SDLV branches /other branches | Cumulative index of diversity, H/N | Distance from Guizhou*, km |
|------------------|------------------------------|--------------------------------------------|------------------------------------|----------------------------|
| Tibet            | 0.2                          | 19/10=1.9                                  | 0.105                              | 1405                       |
| Gansu            | 0.28                         | 13/19=0.68                                 | 0.412                              | 986                        |
| Manchuria        | 0.19                         | 25/8=3.13                                  | 0.061                              | 2649                       |
| Guizhou          | 0.27                         | 1/11=0.09                                  | 3                                  | 0                          |
| Fujian           | 0.20                         | 10/8=1.25                                  | 0.160                              | 1364                       |
| Anhui            | 0.17                         | 16/8=2                                     | 0.085                              | 1189 1260                  |

\*Distance between Bijie (the largest city in Guizhou) and the largest city of the respective province/region, calculated using: <http://www.distancefromto.net/>

(A)

Supplementary Figure S1. Minimum spanning tree of 24-VNTR loci with highlighted regions of strain isolation.

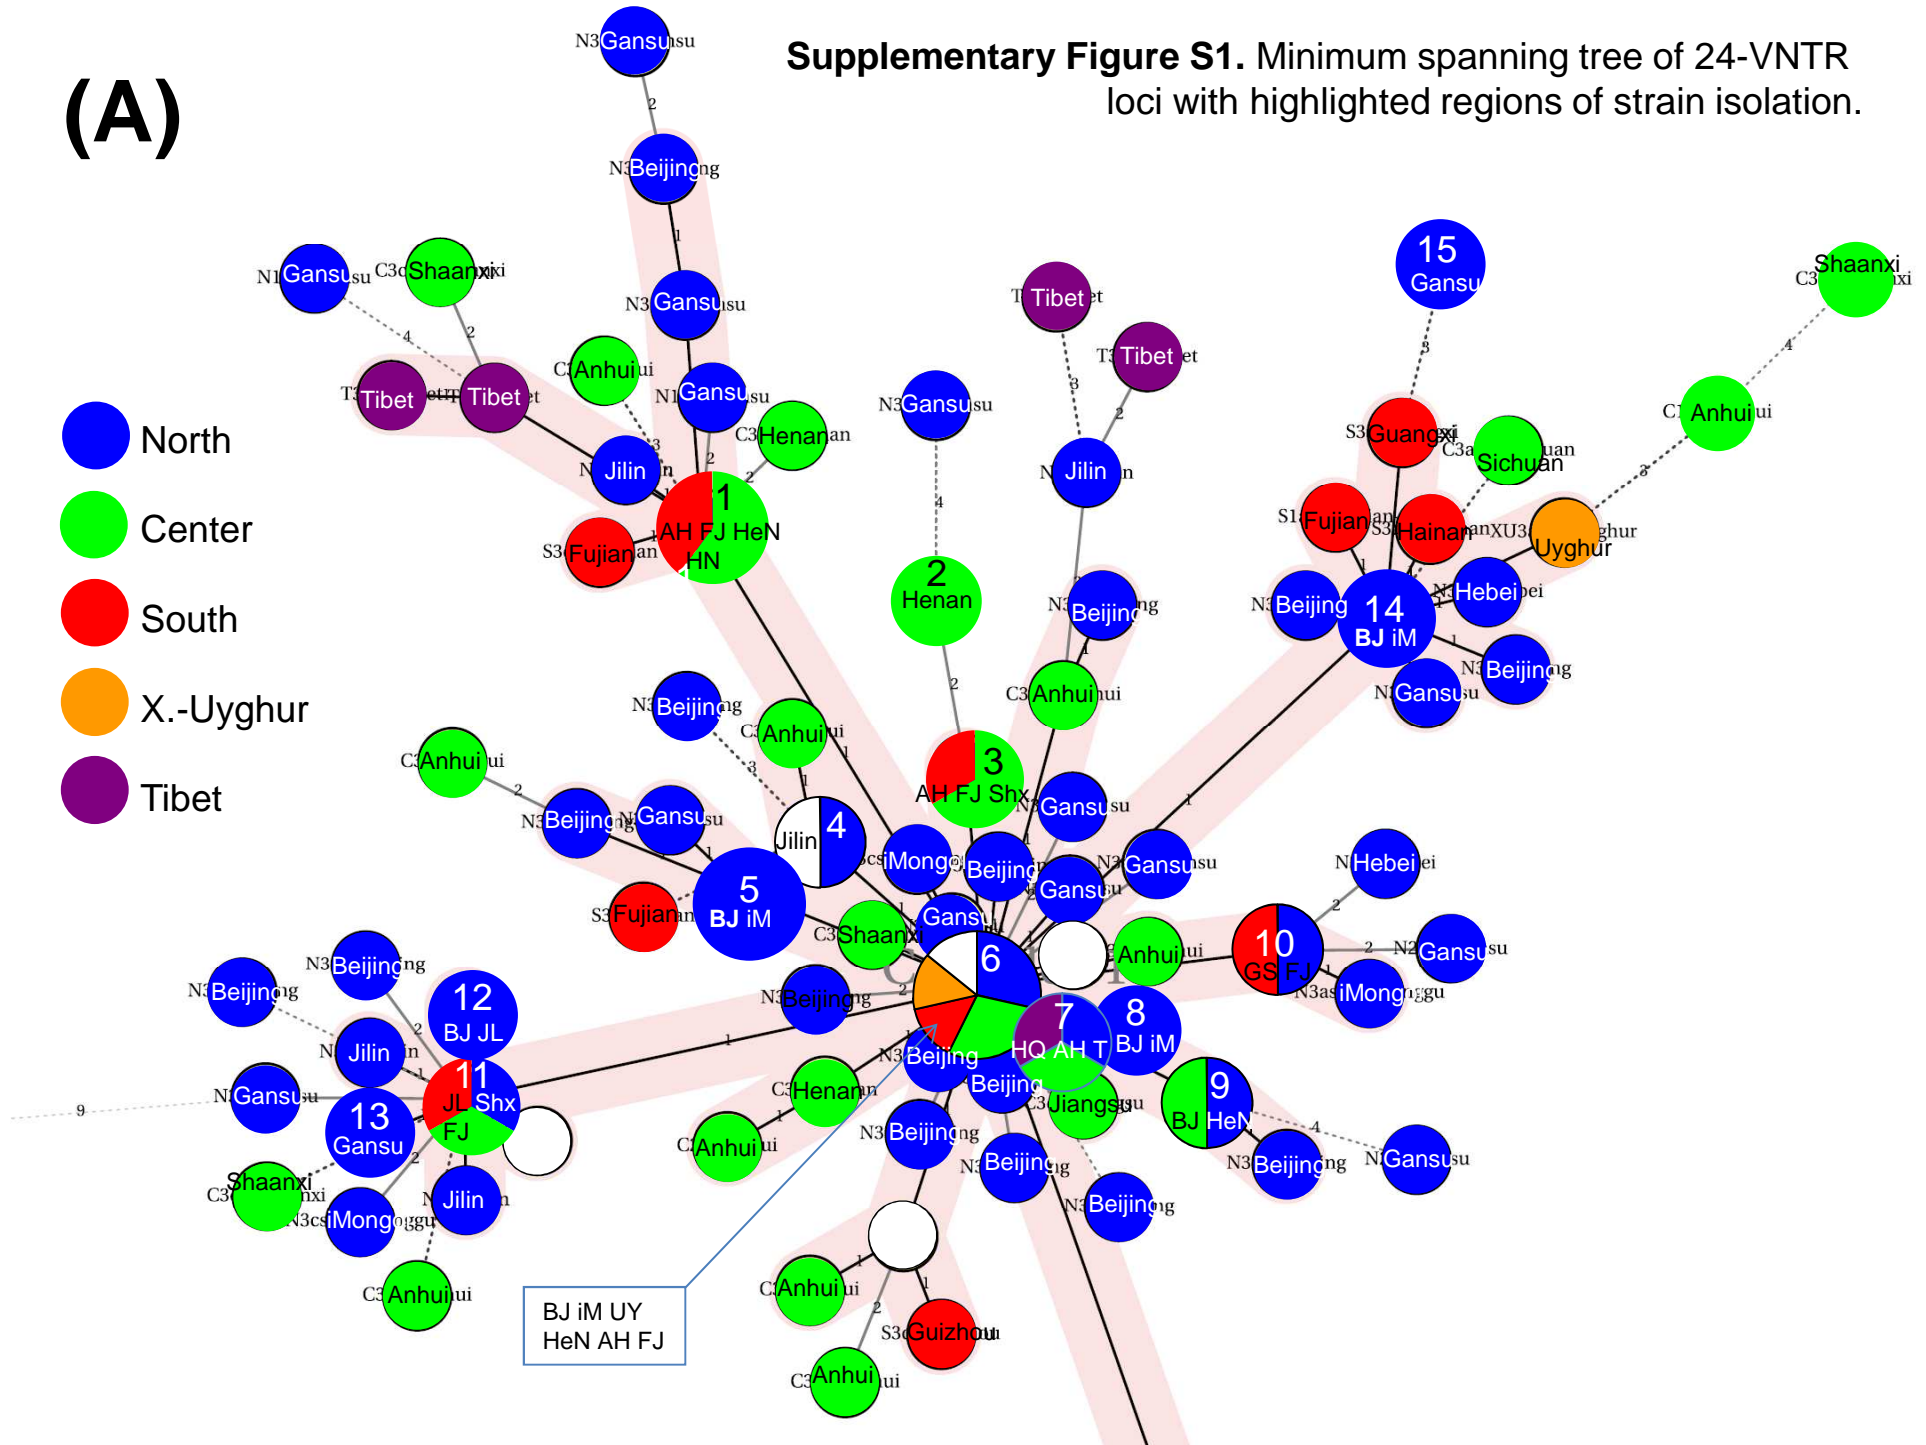

**(B)**

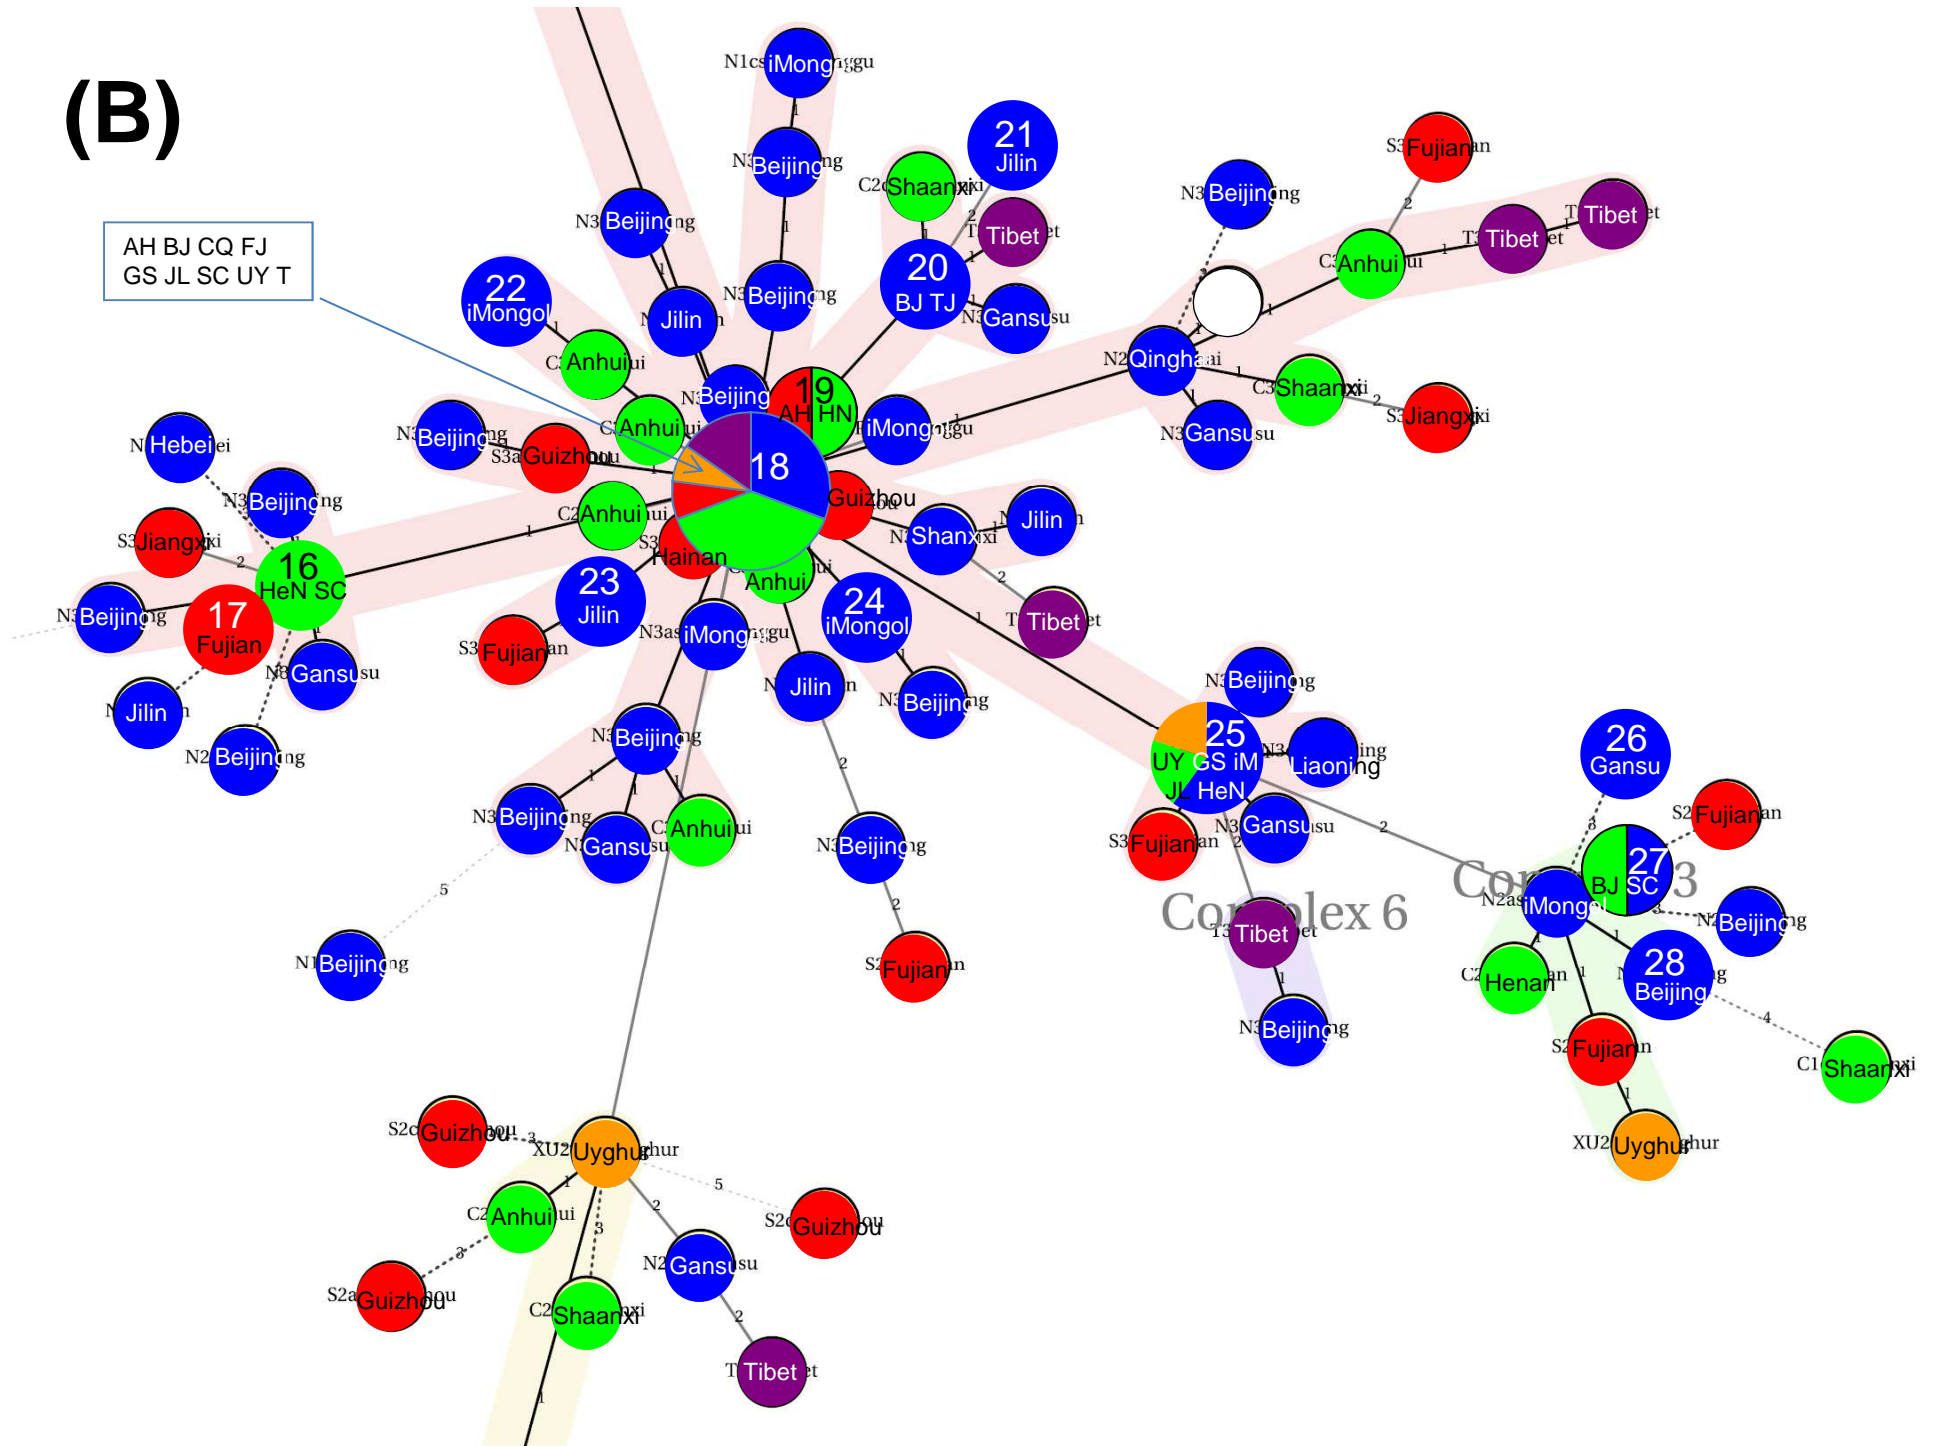

(C)

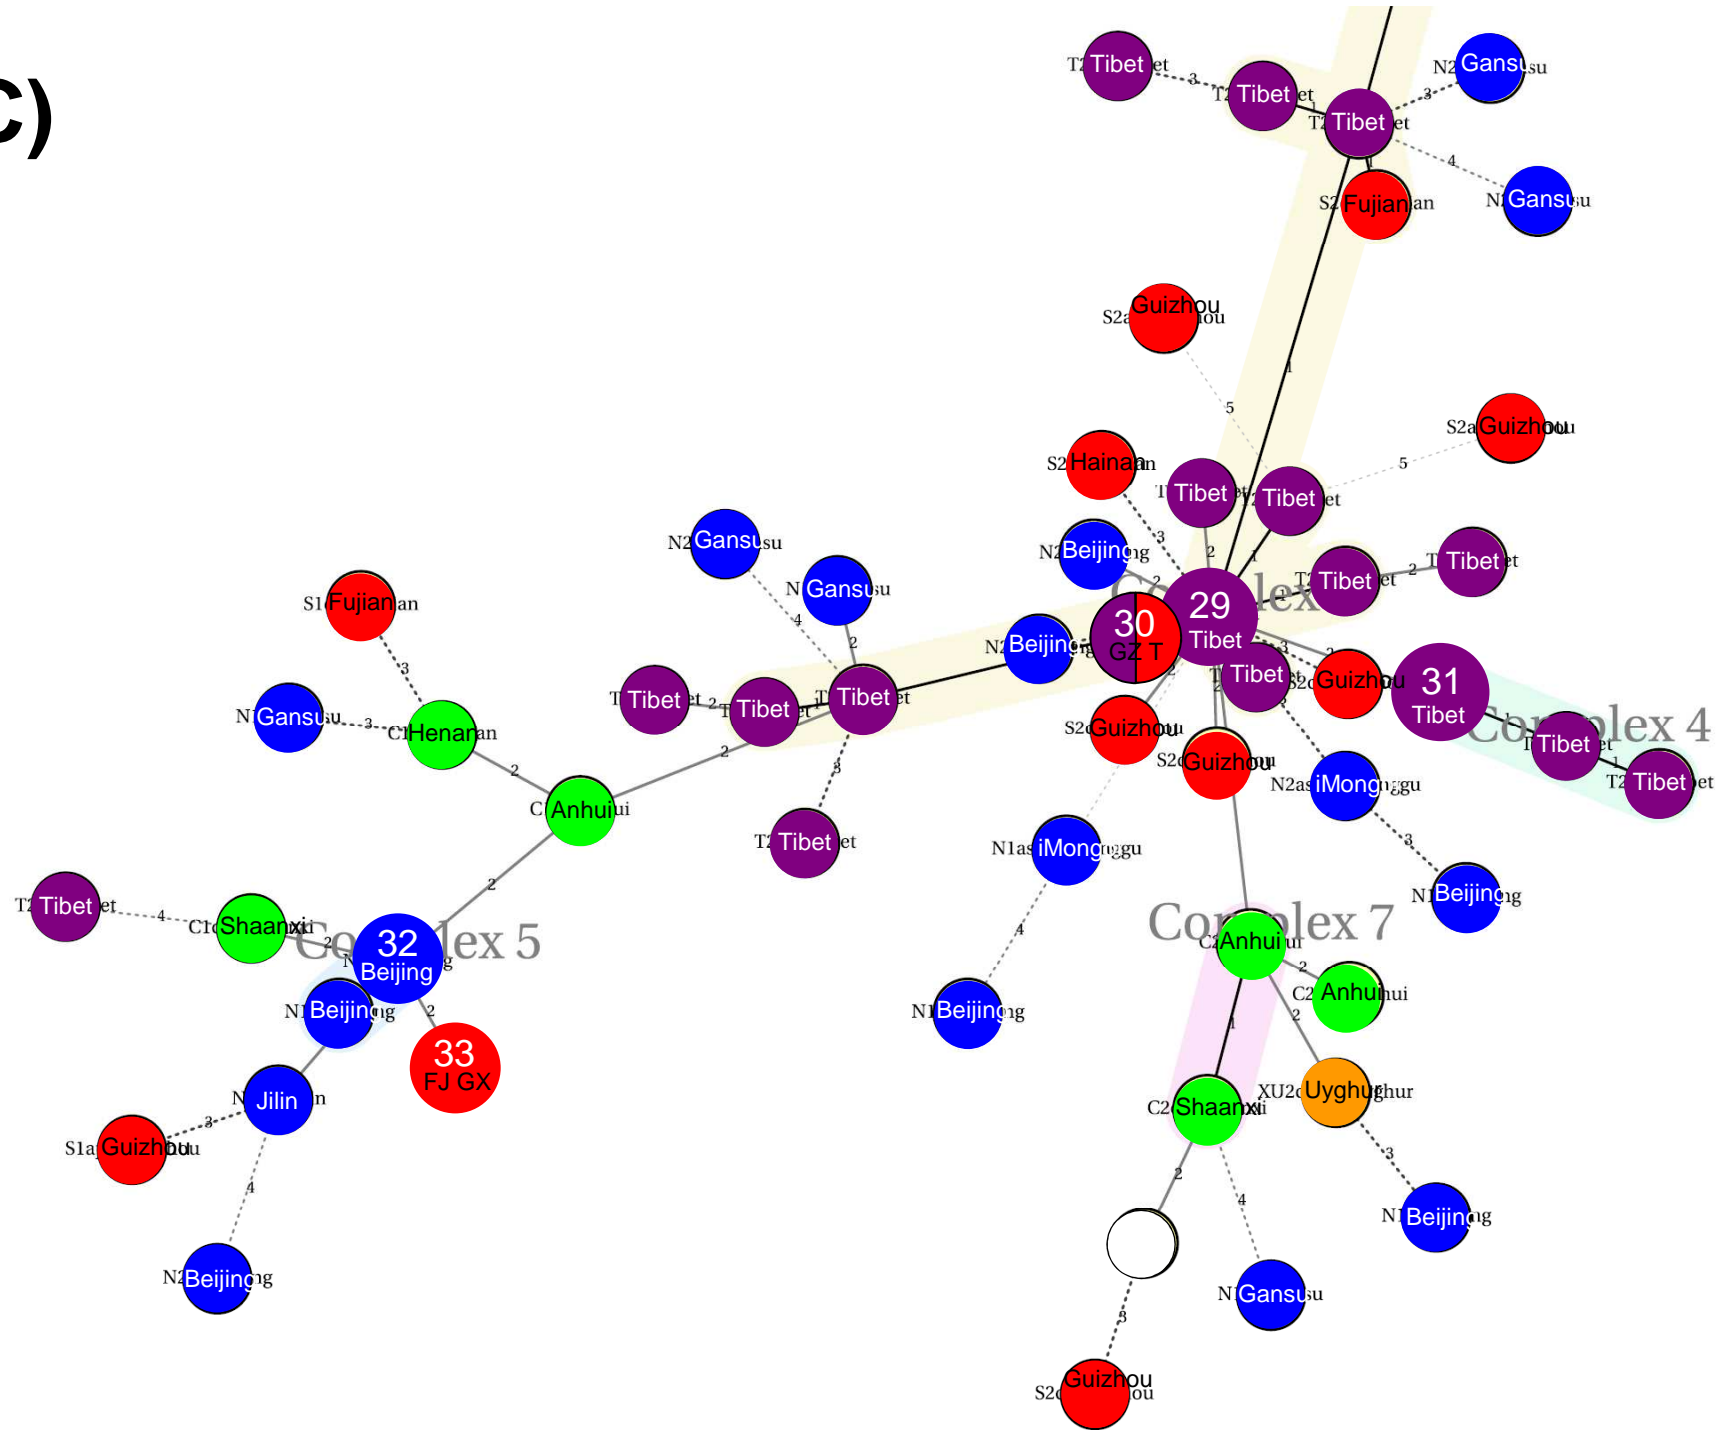

**(A)** Beijing:  
■ Early ancient  
■ Ancient  
■ Modern

**Supplementary Figure S2.** Minimum spanning tree of 24-VNTR loci with highlighted Beijing genotype sublineages.

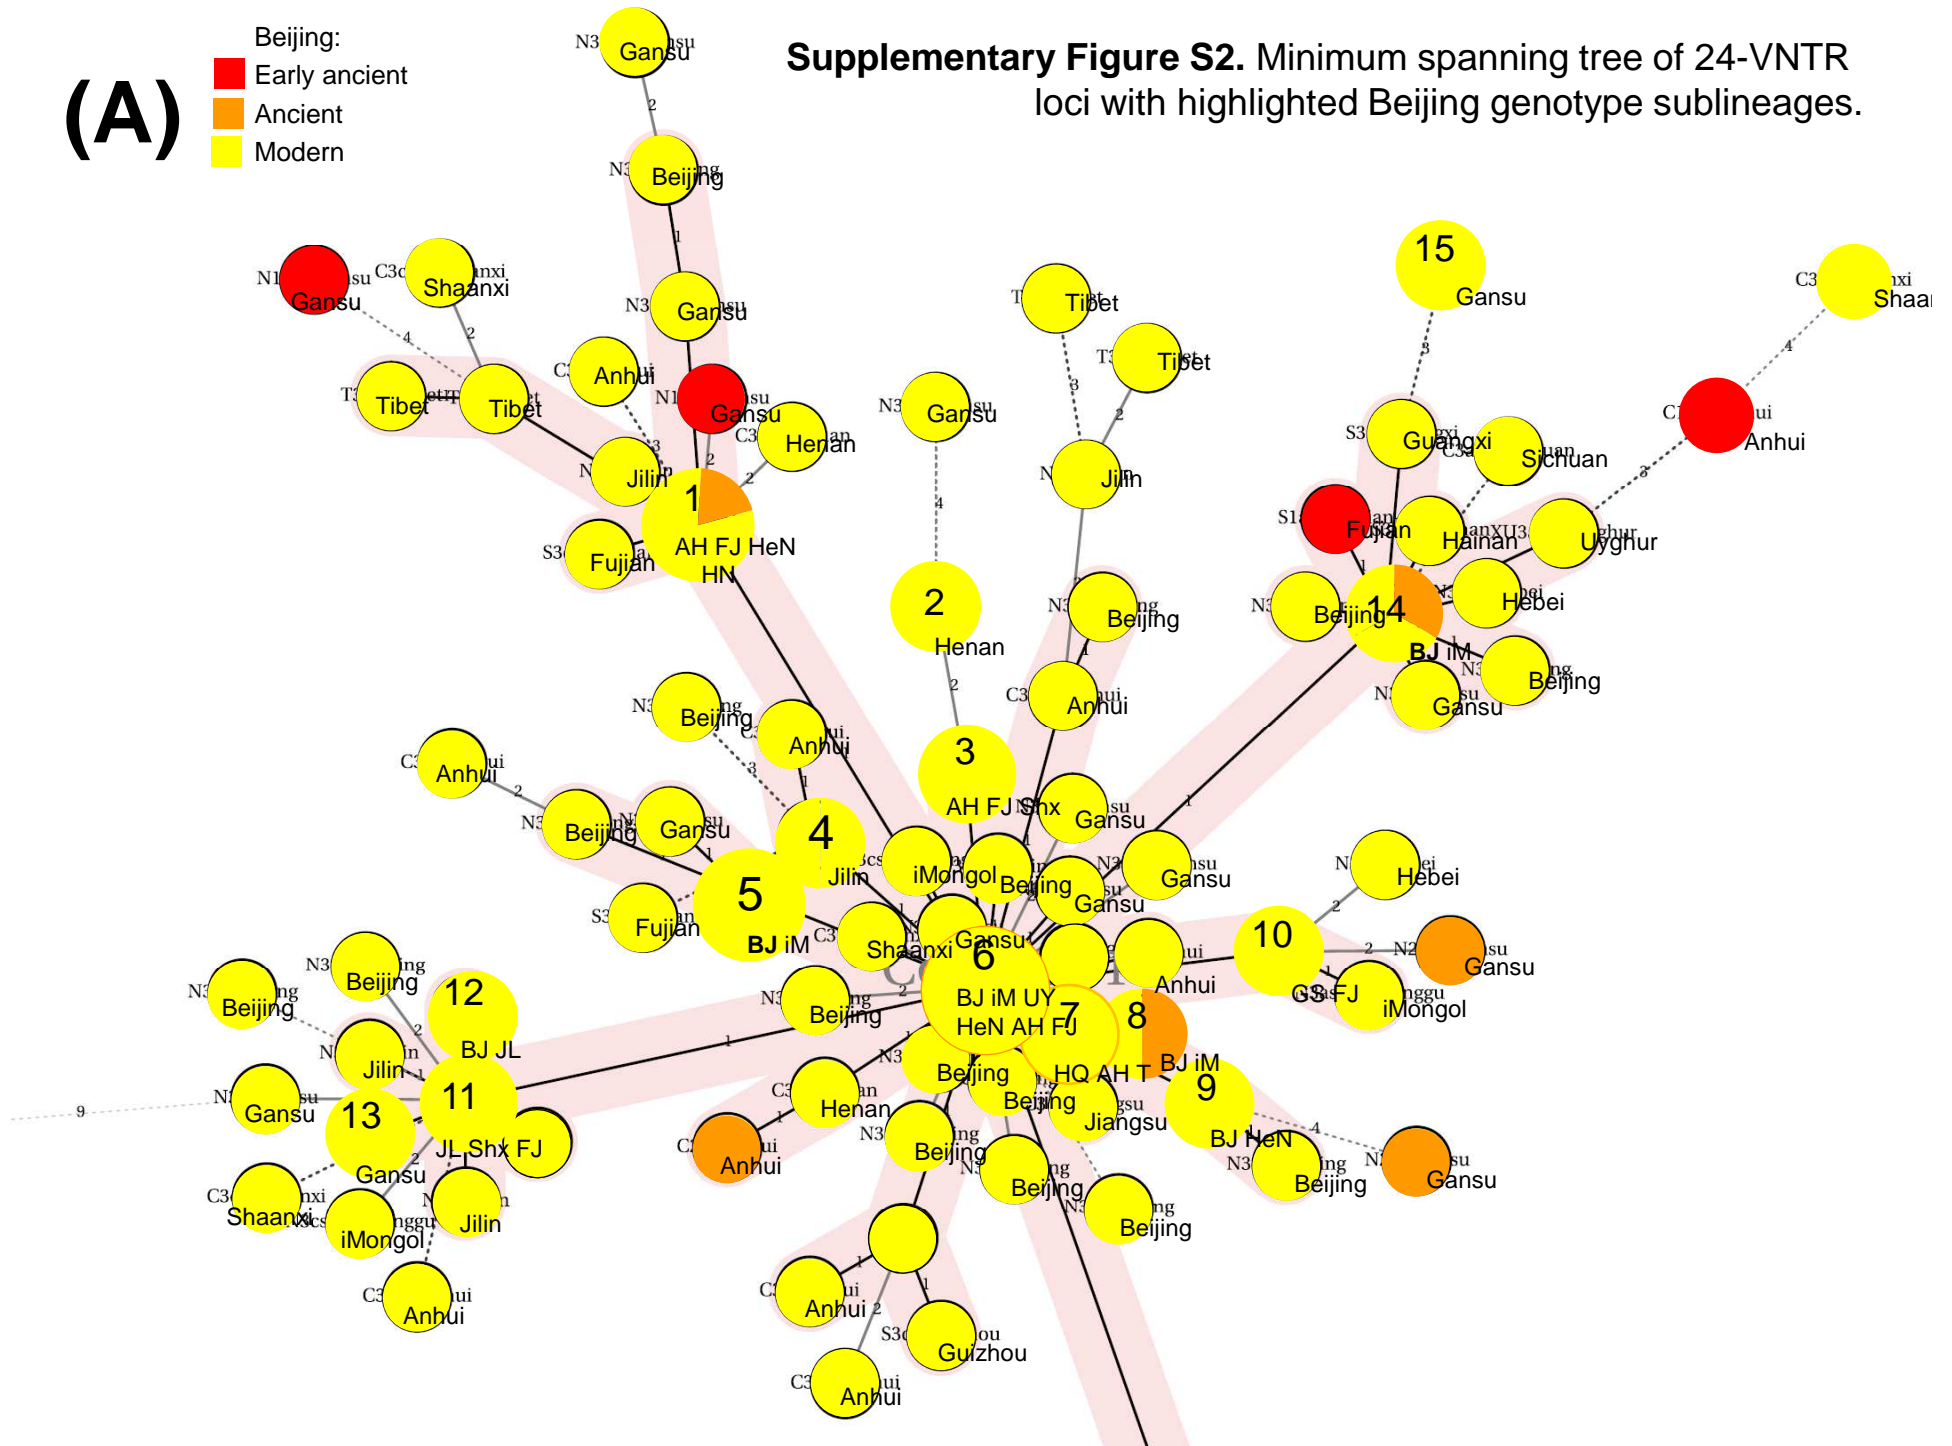



(C) Beijing:  
■ Early ancient  
■ Ancient  
■ Modern

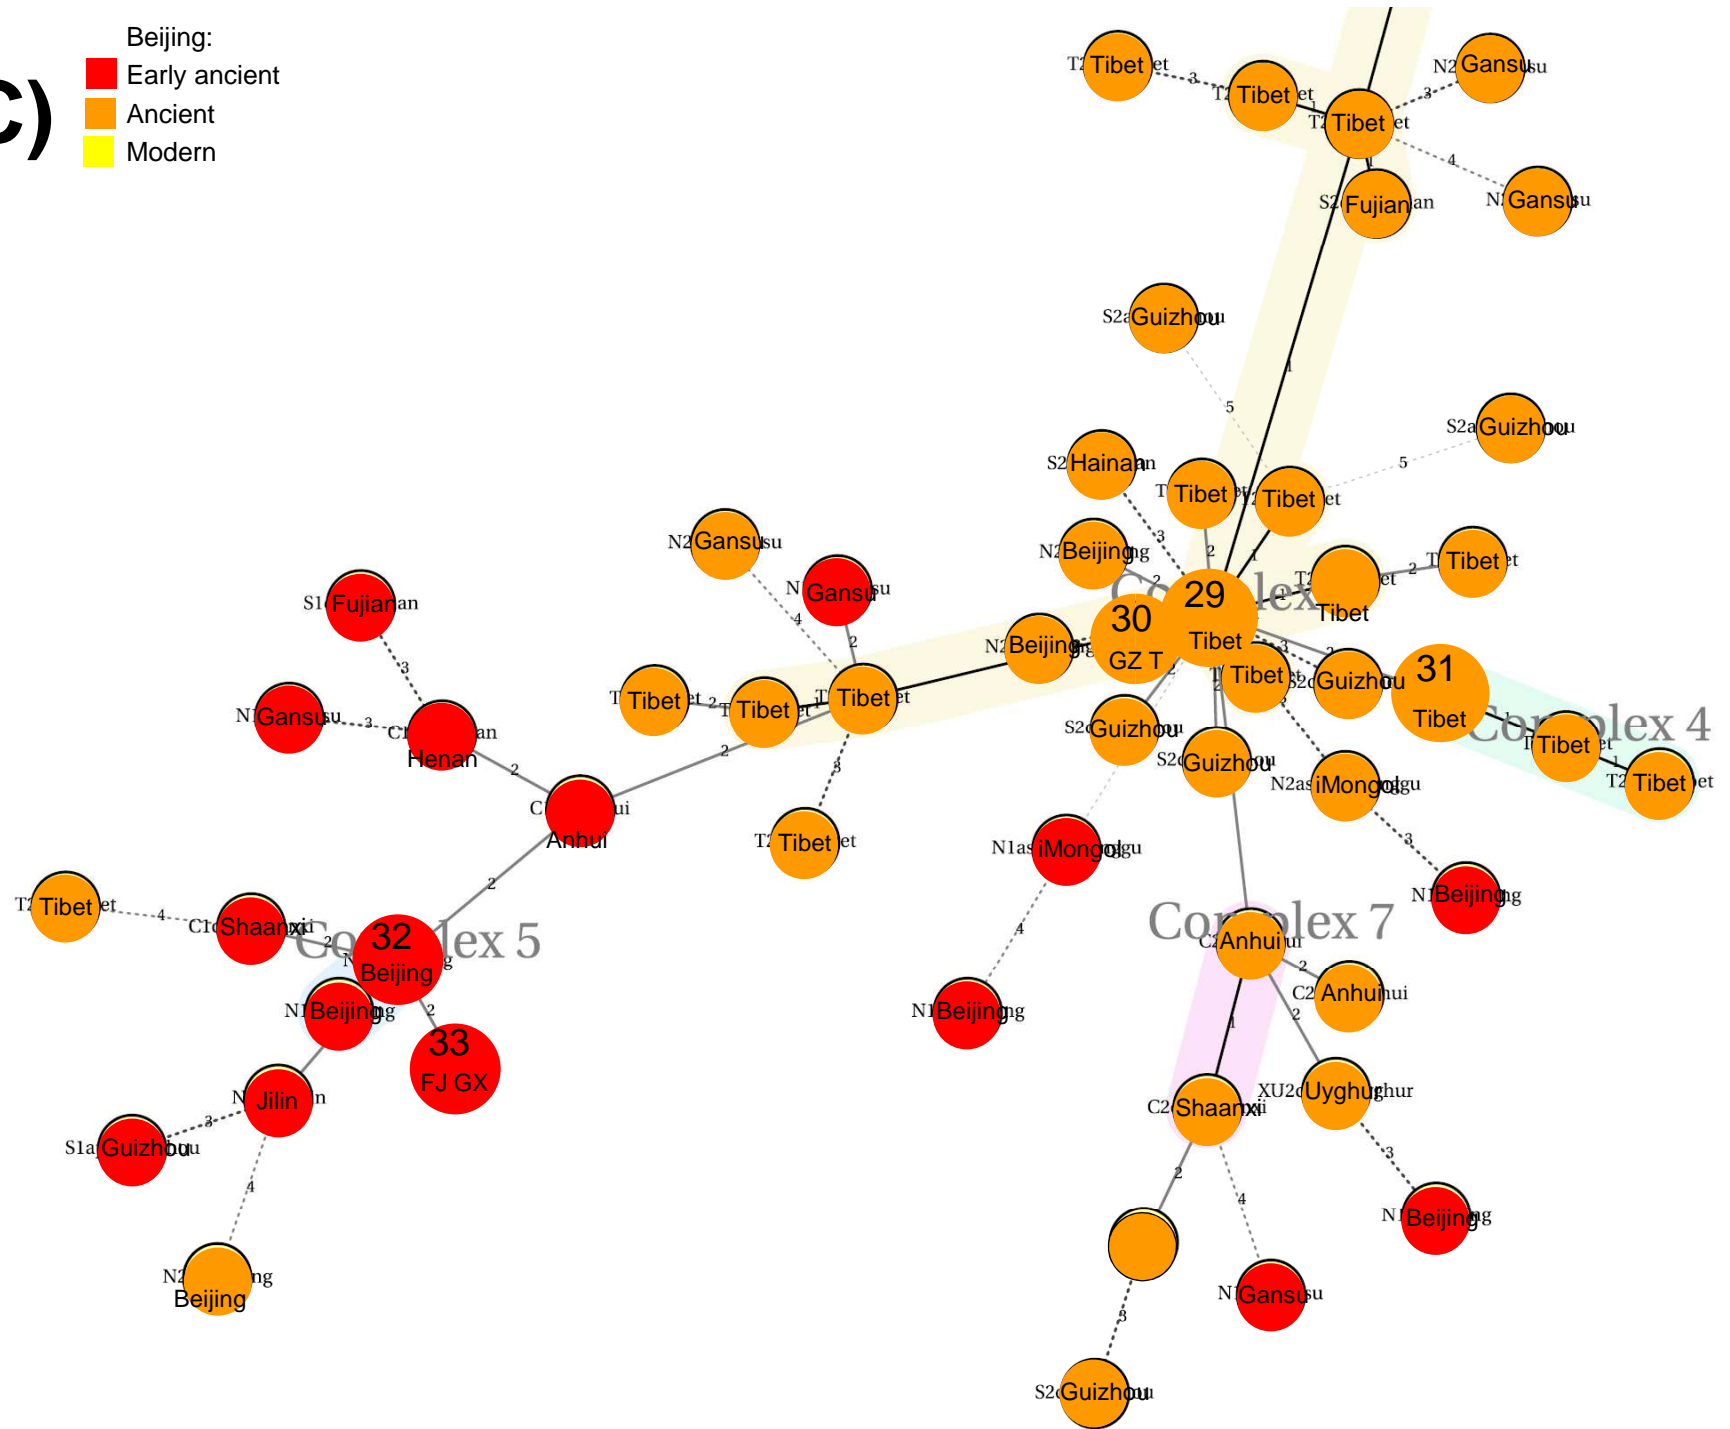

**(A)** ■ Adult ■ Child

**Supplementary Figure S3.** Minimum spanning tree of 24-VNTR loci with highlighted age group (adult/child).

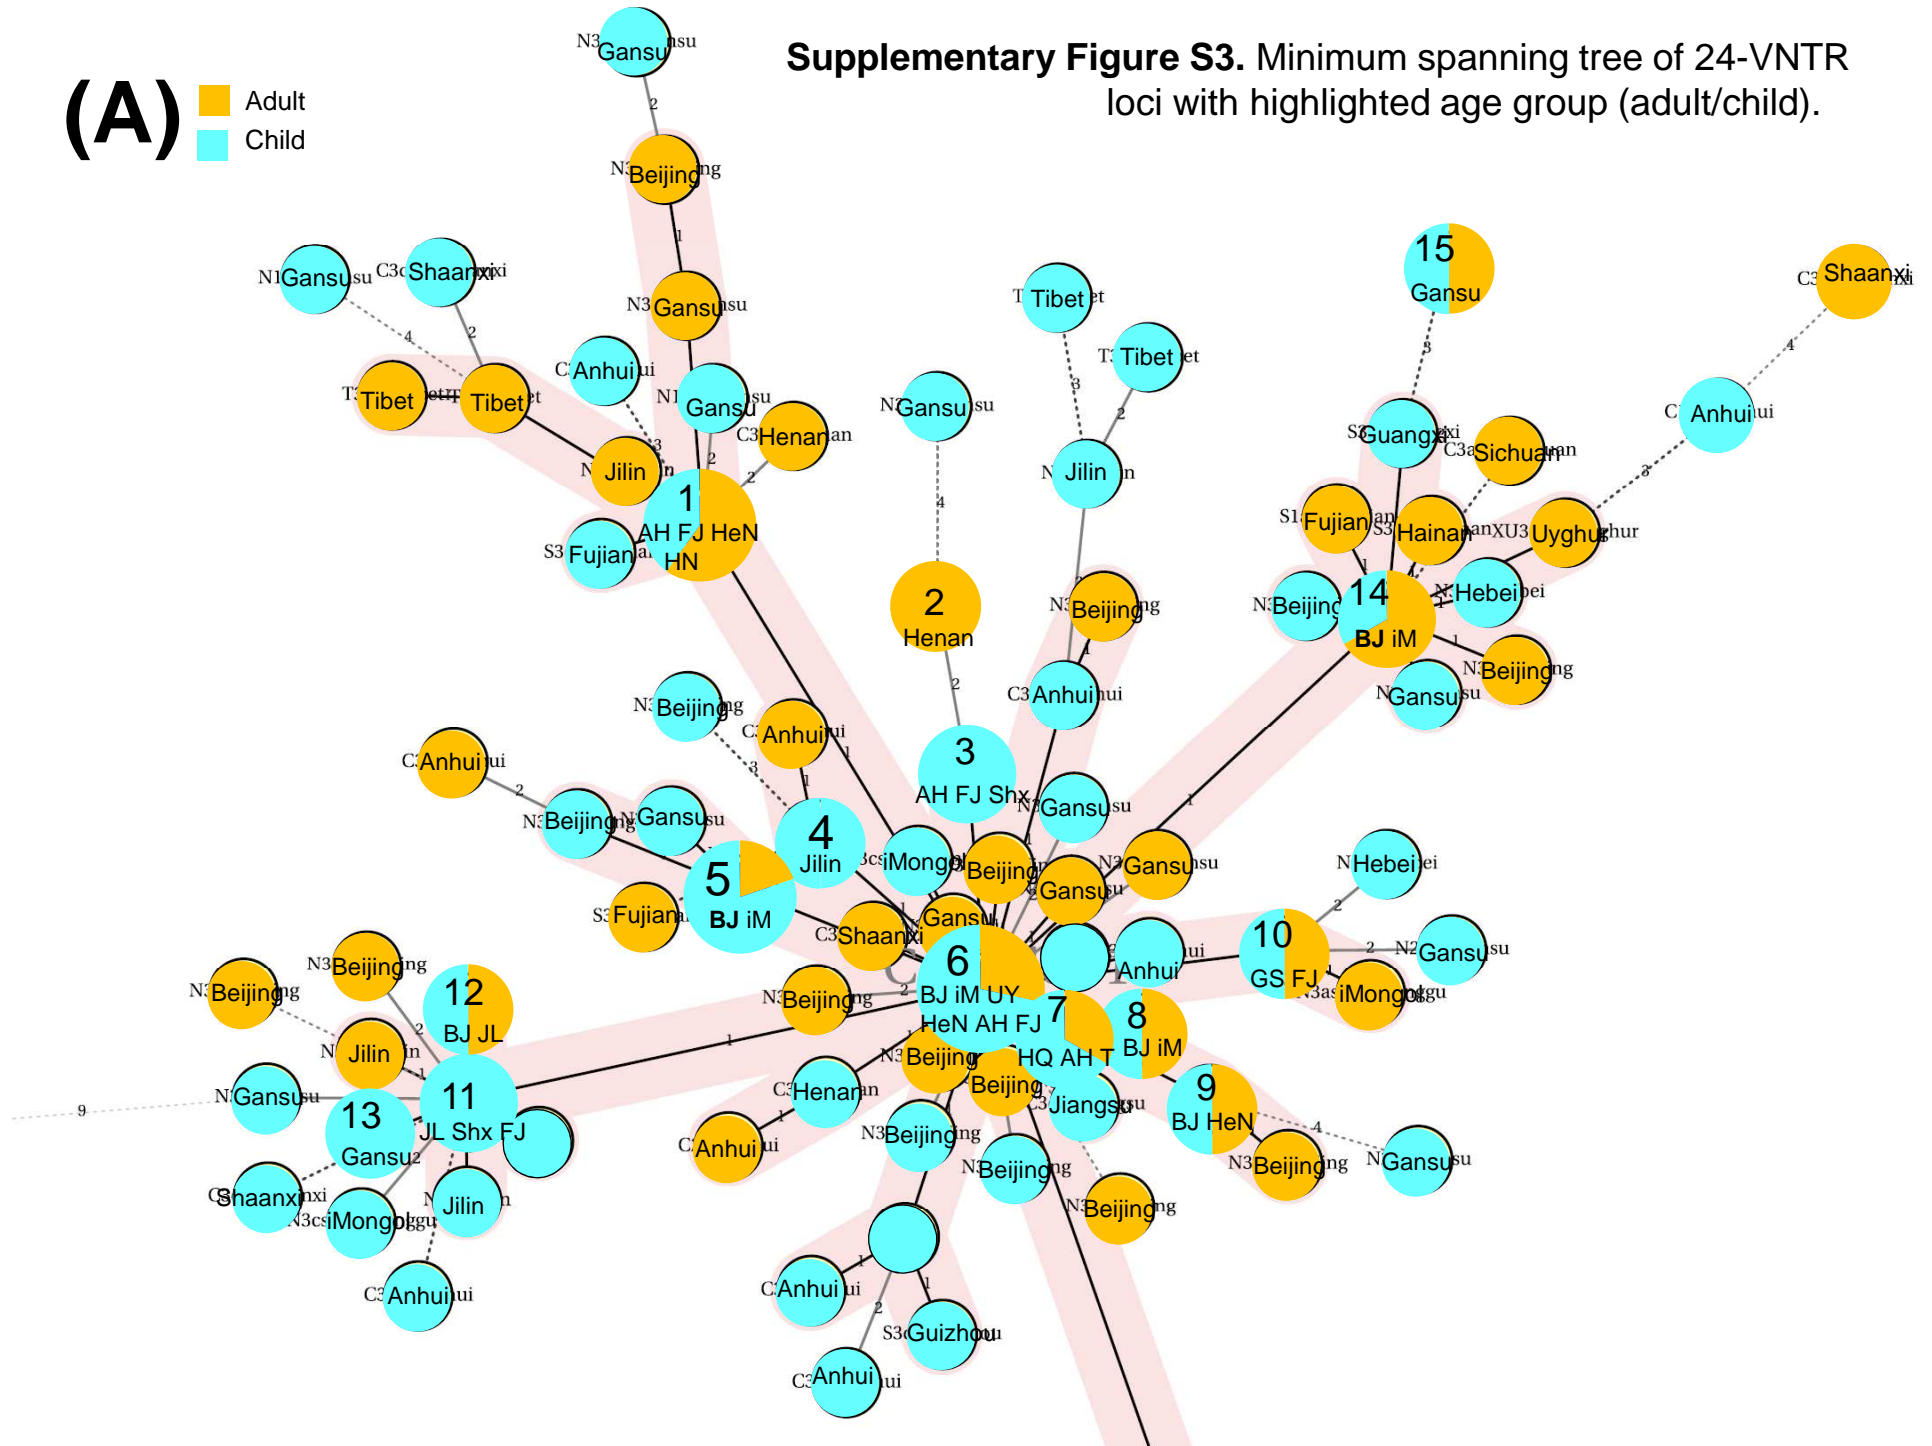



**(B)** ■ Adult ■ Child

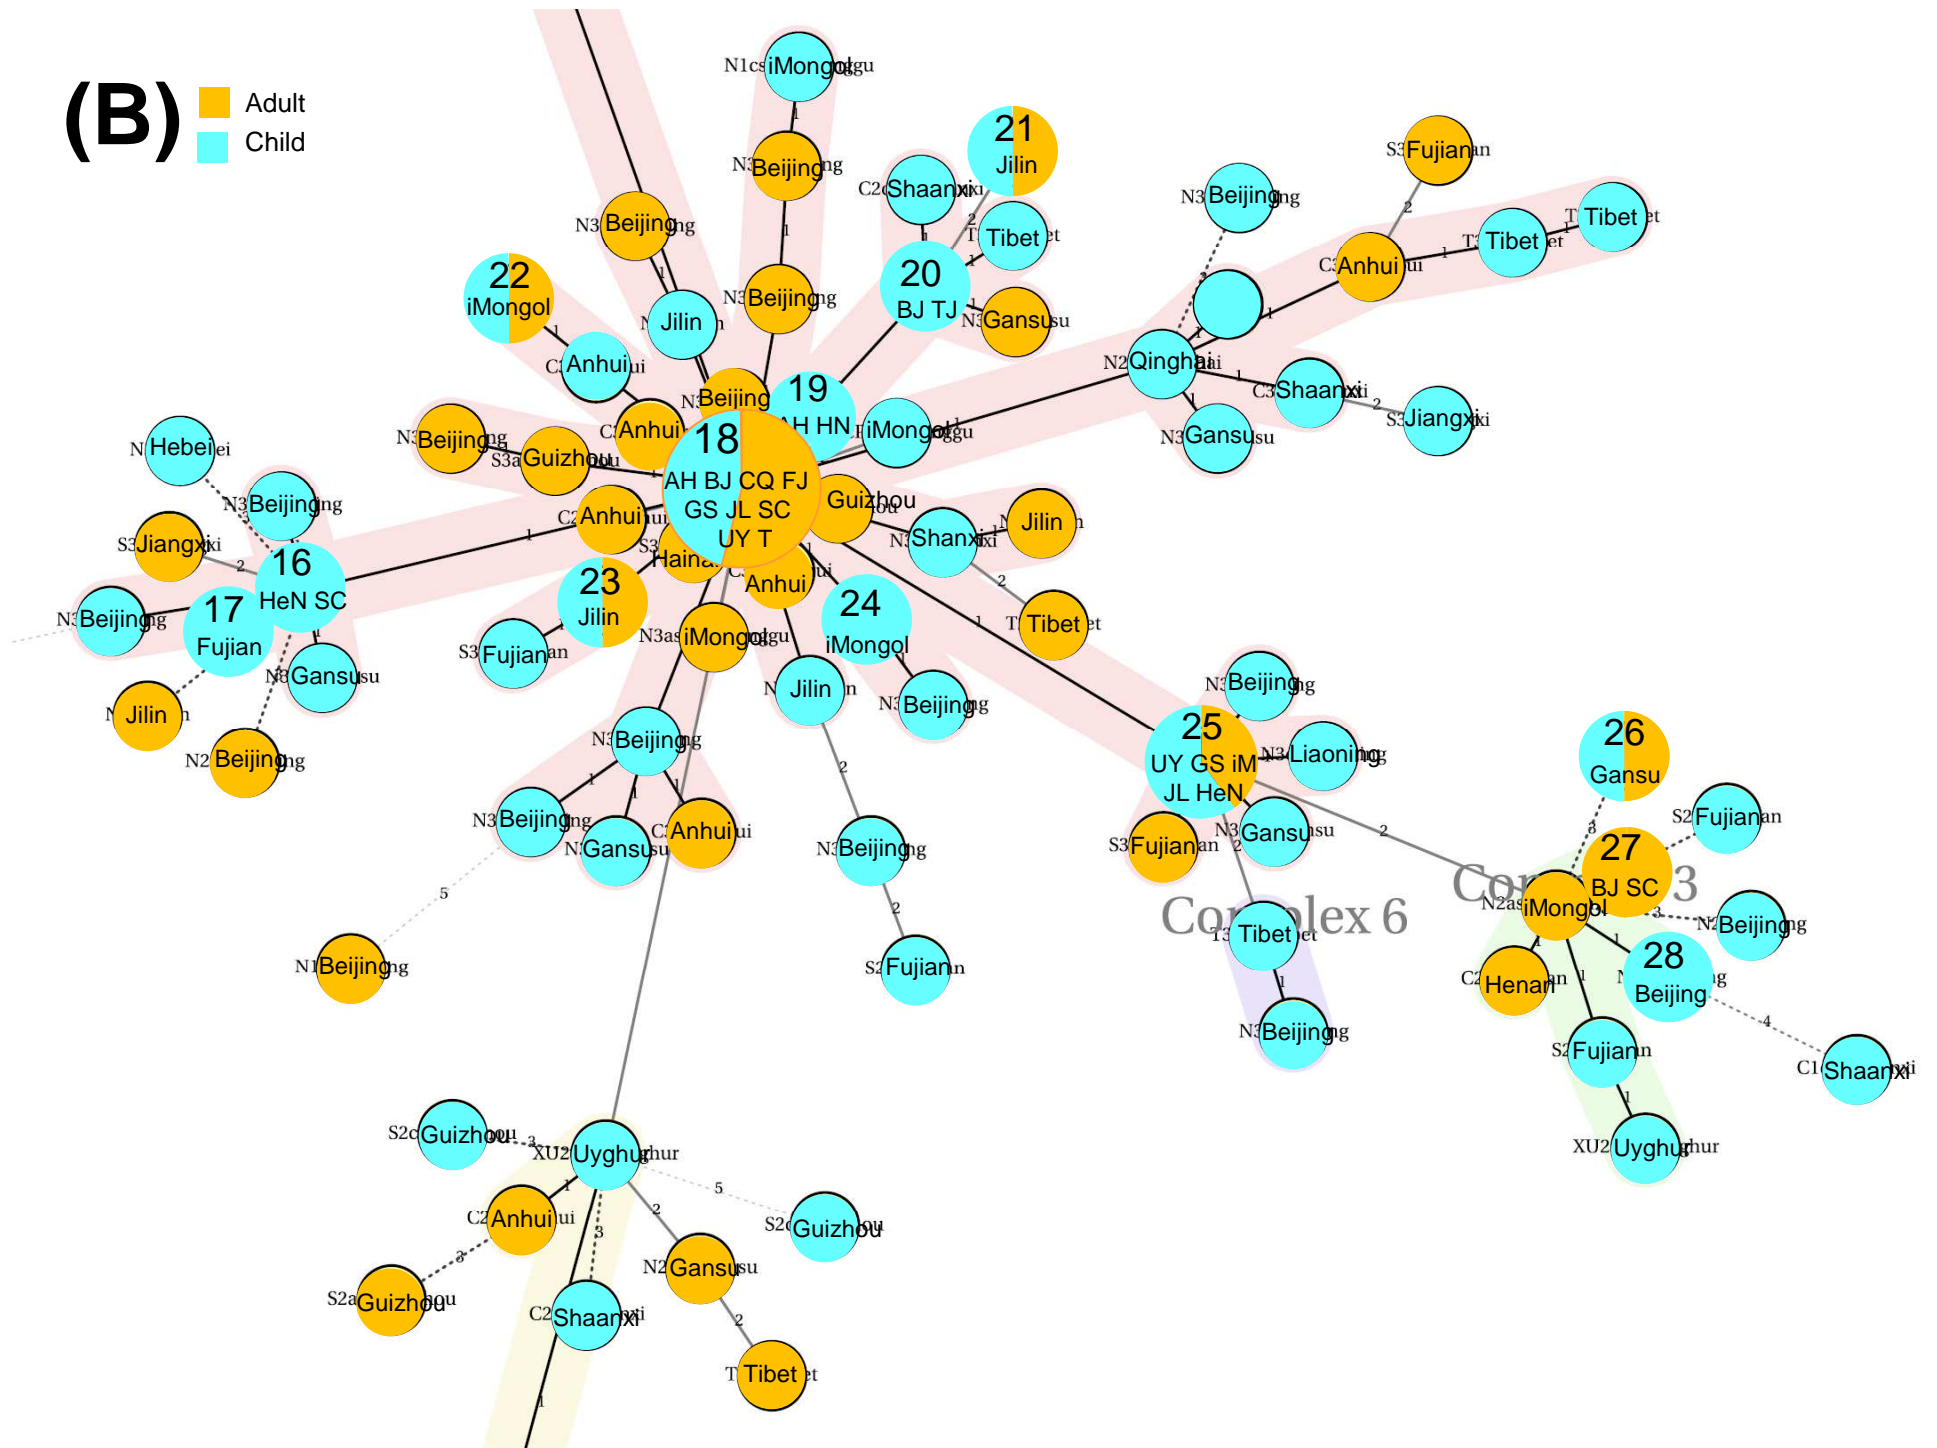

(C) ■ Adult ■ Child

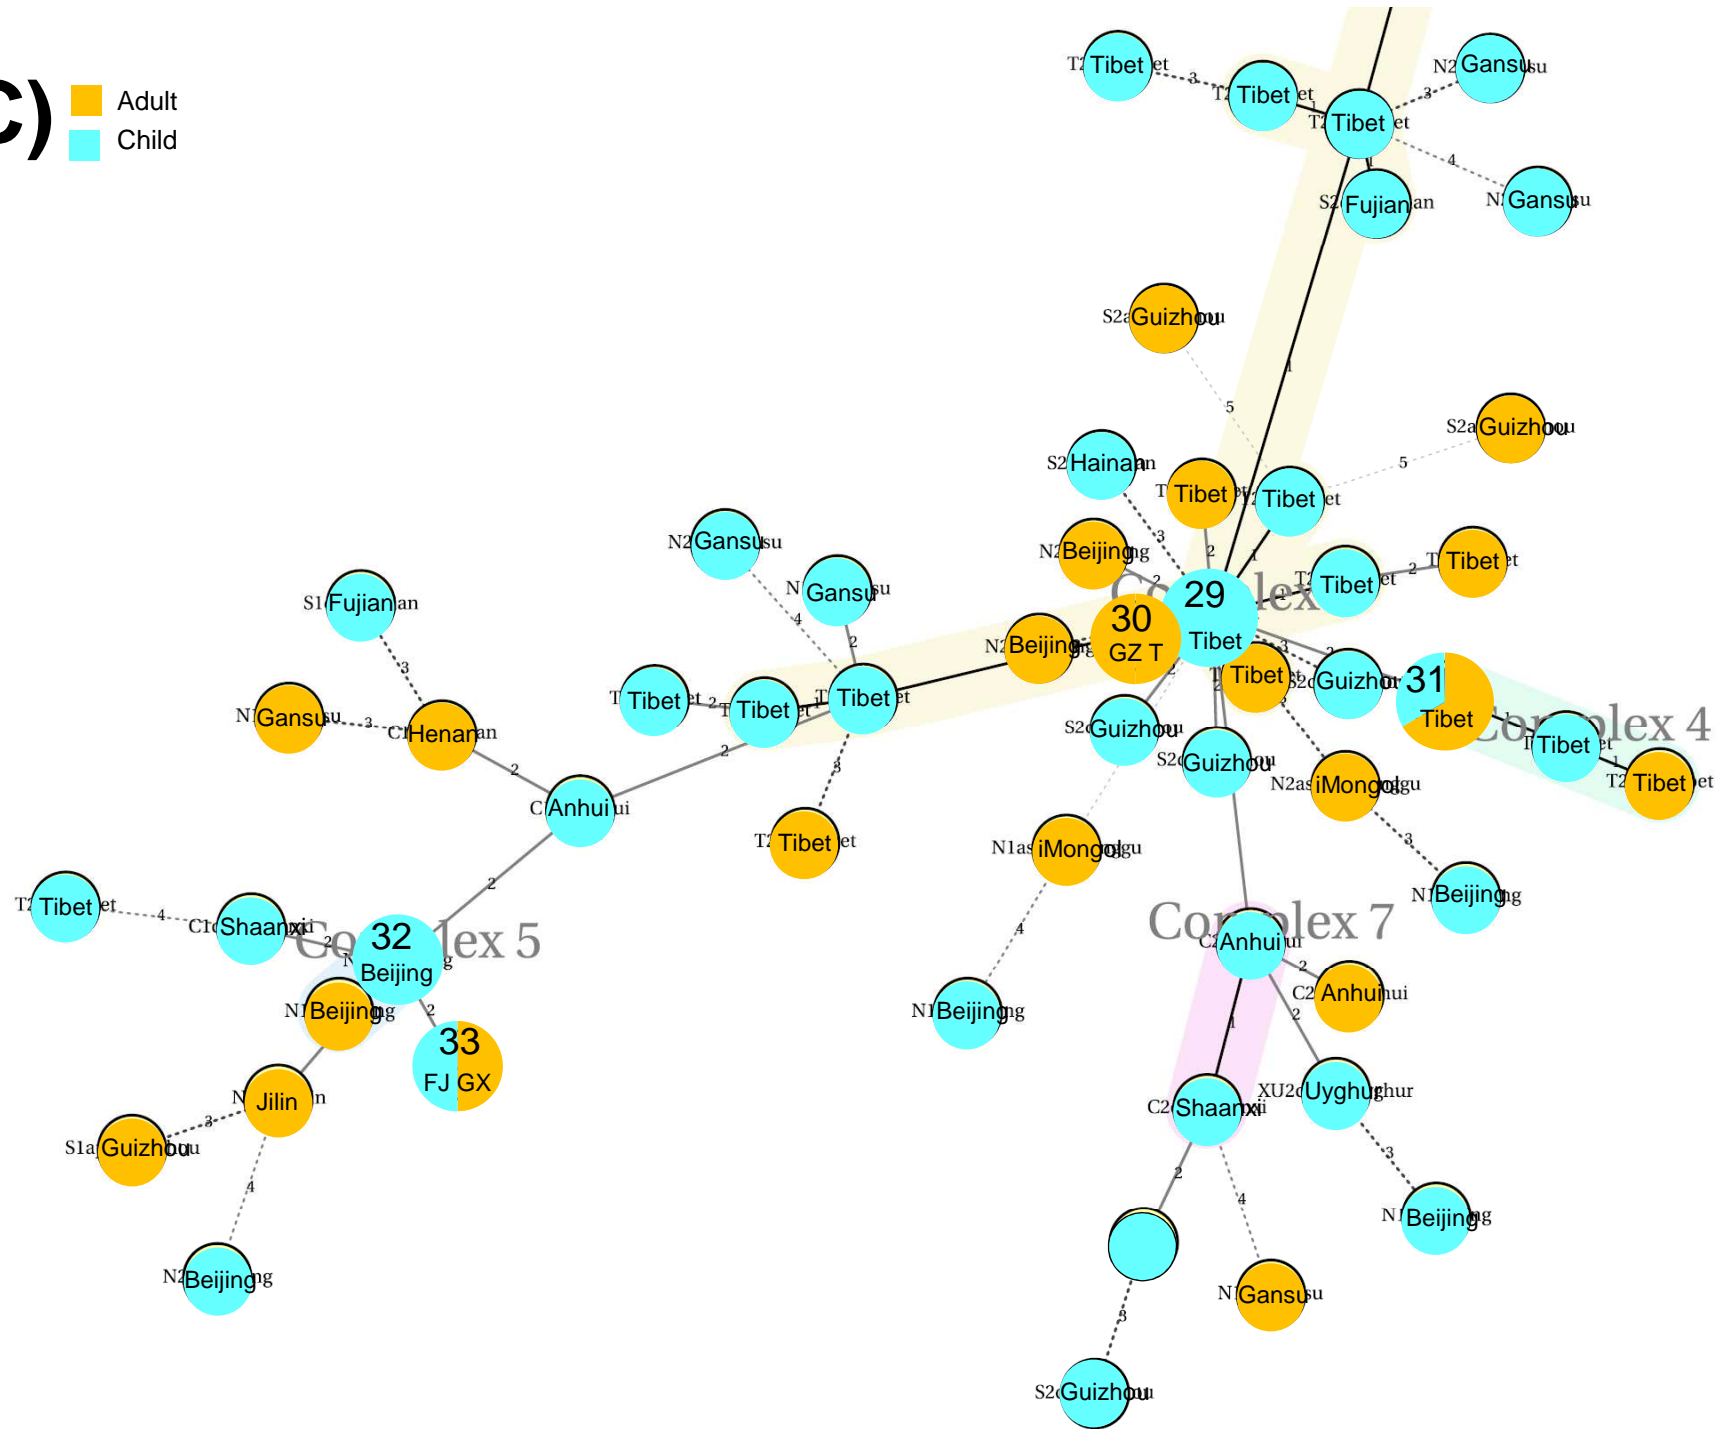

(A)

Supplementary Figure S4. Minimum spanning tree of 24-VNTR loci with highlighted drug resistance profile.

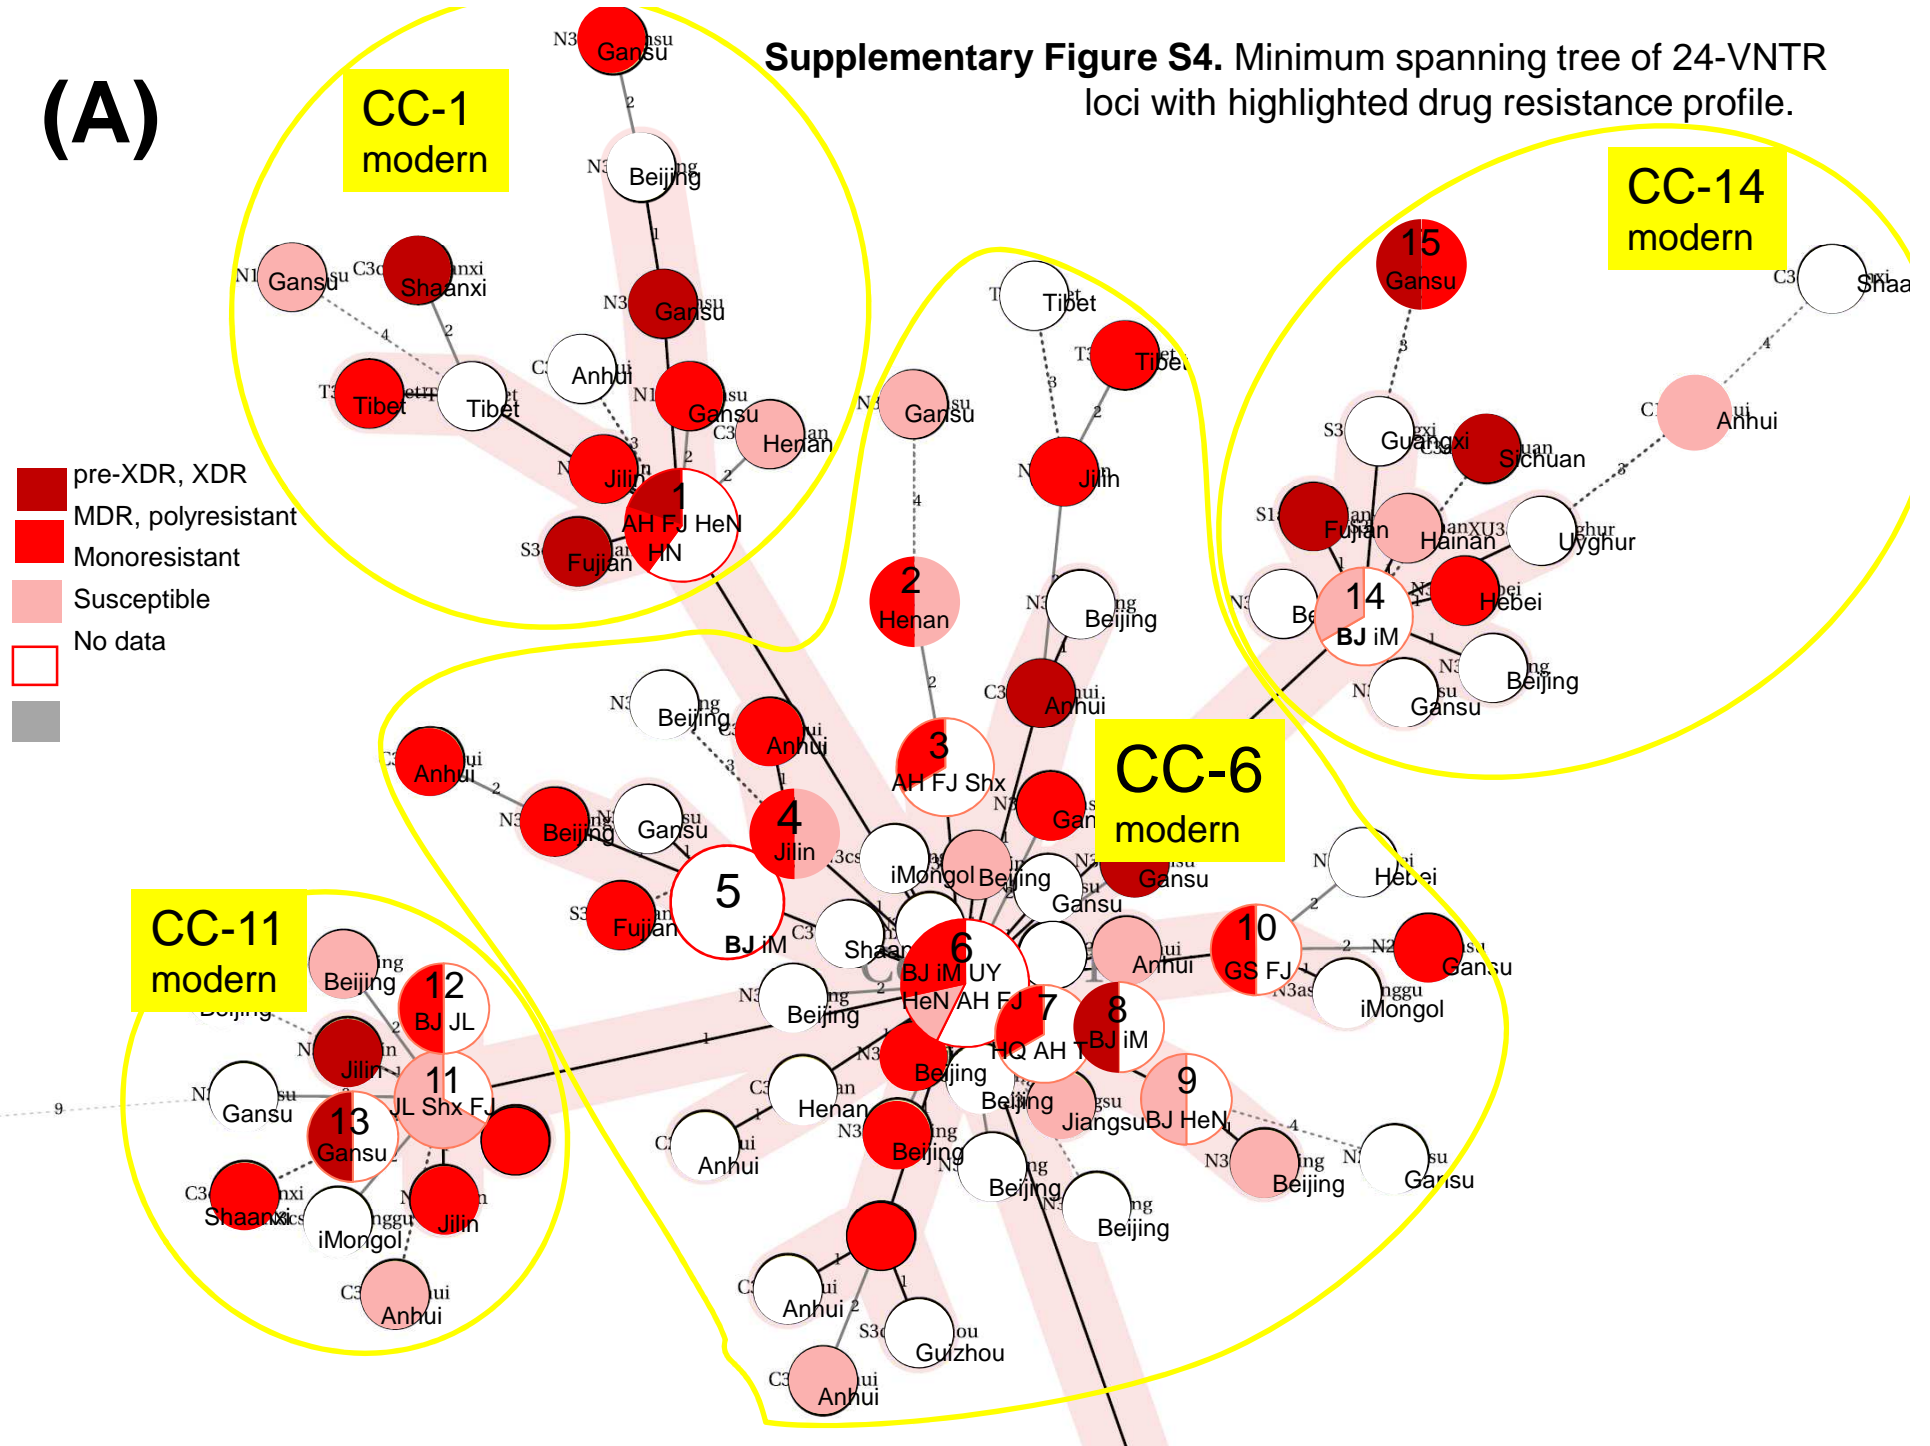

**(B)**

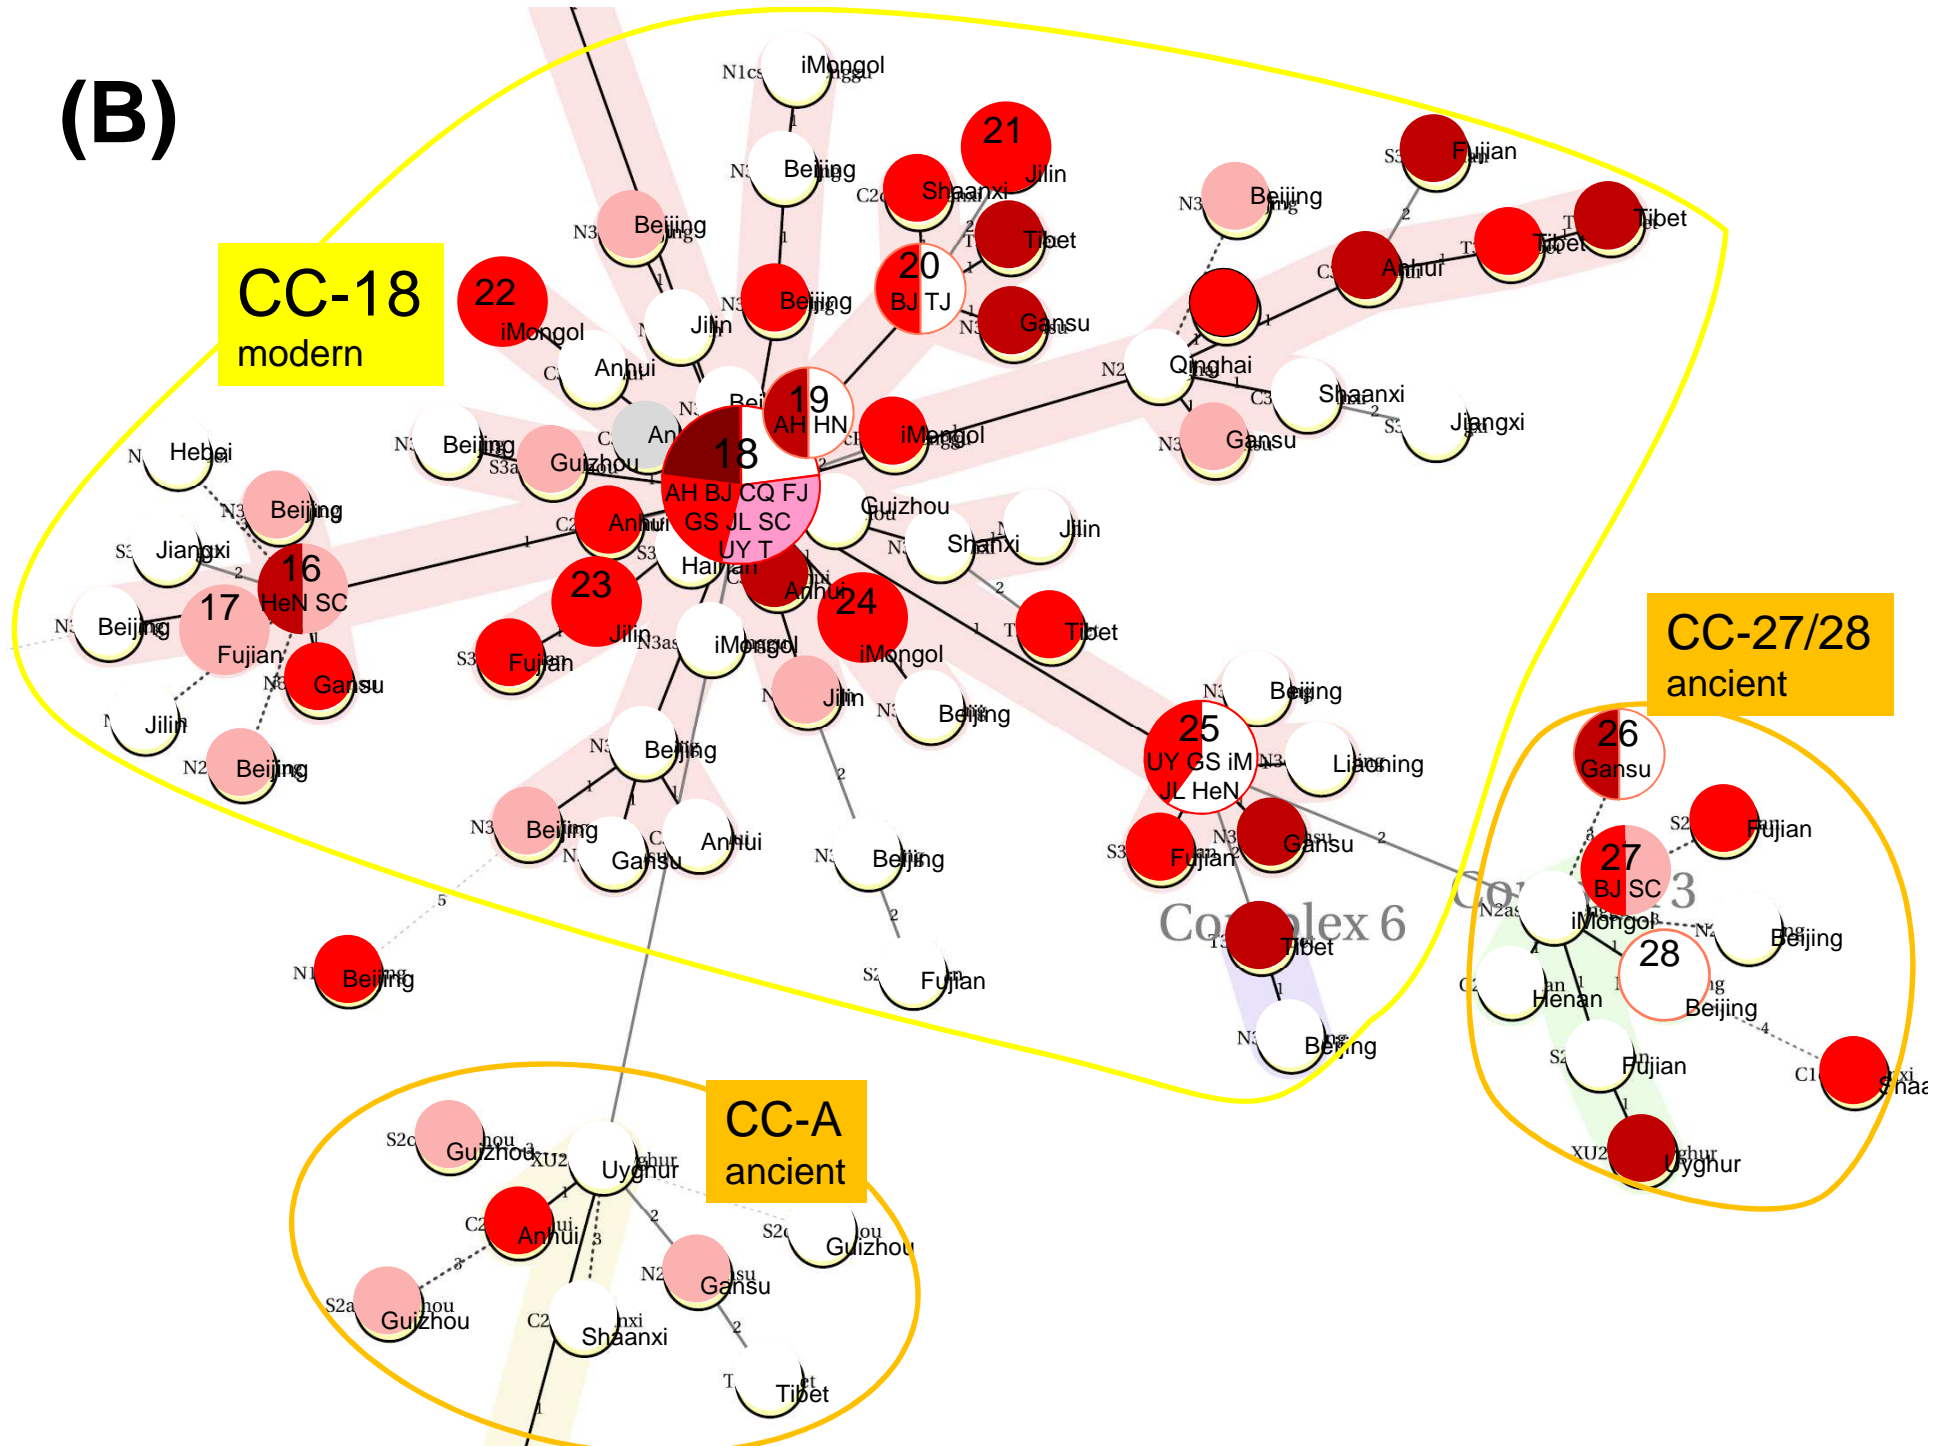

(C)

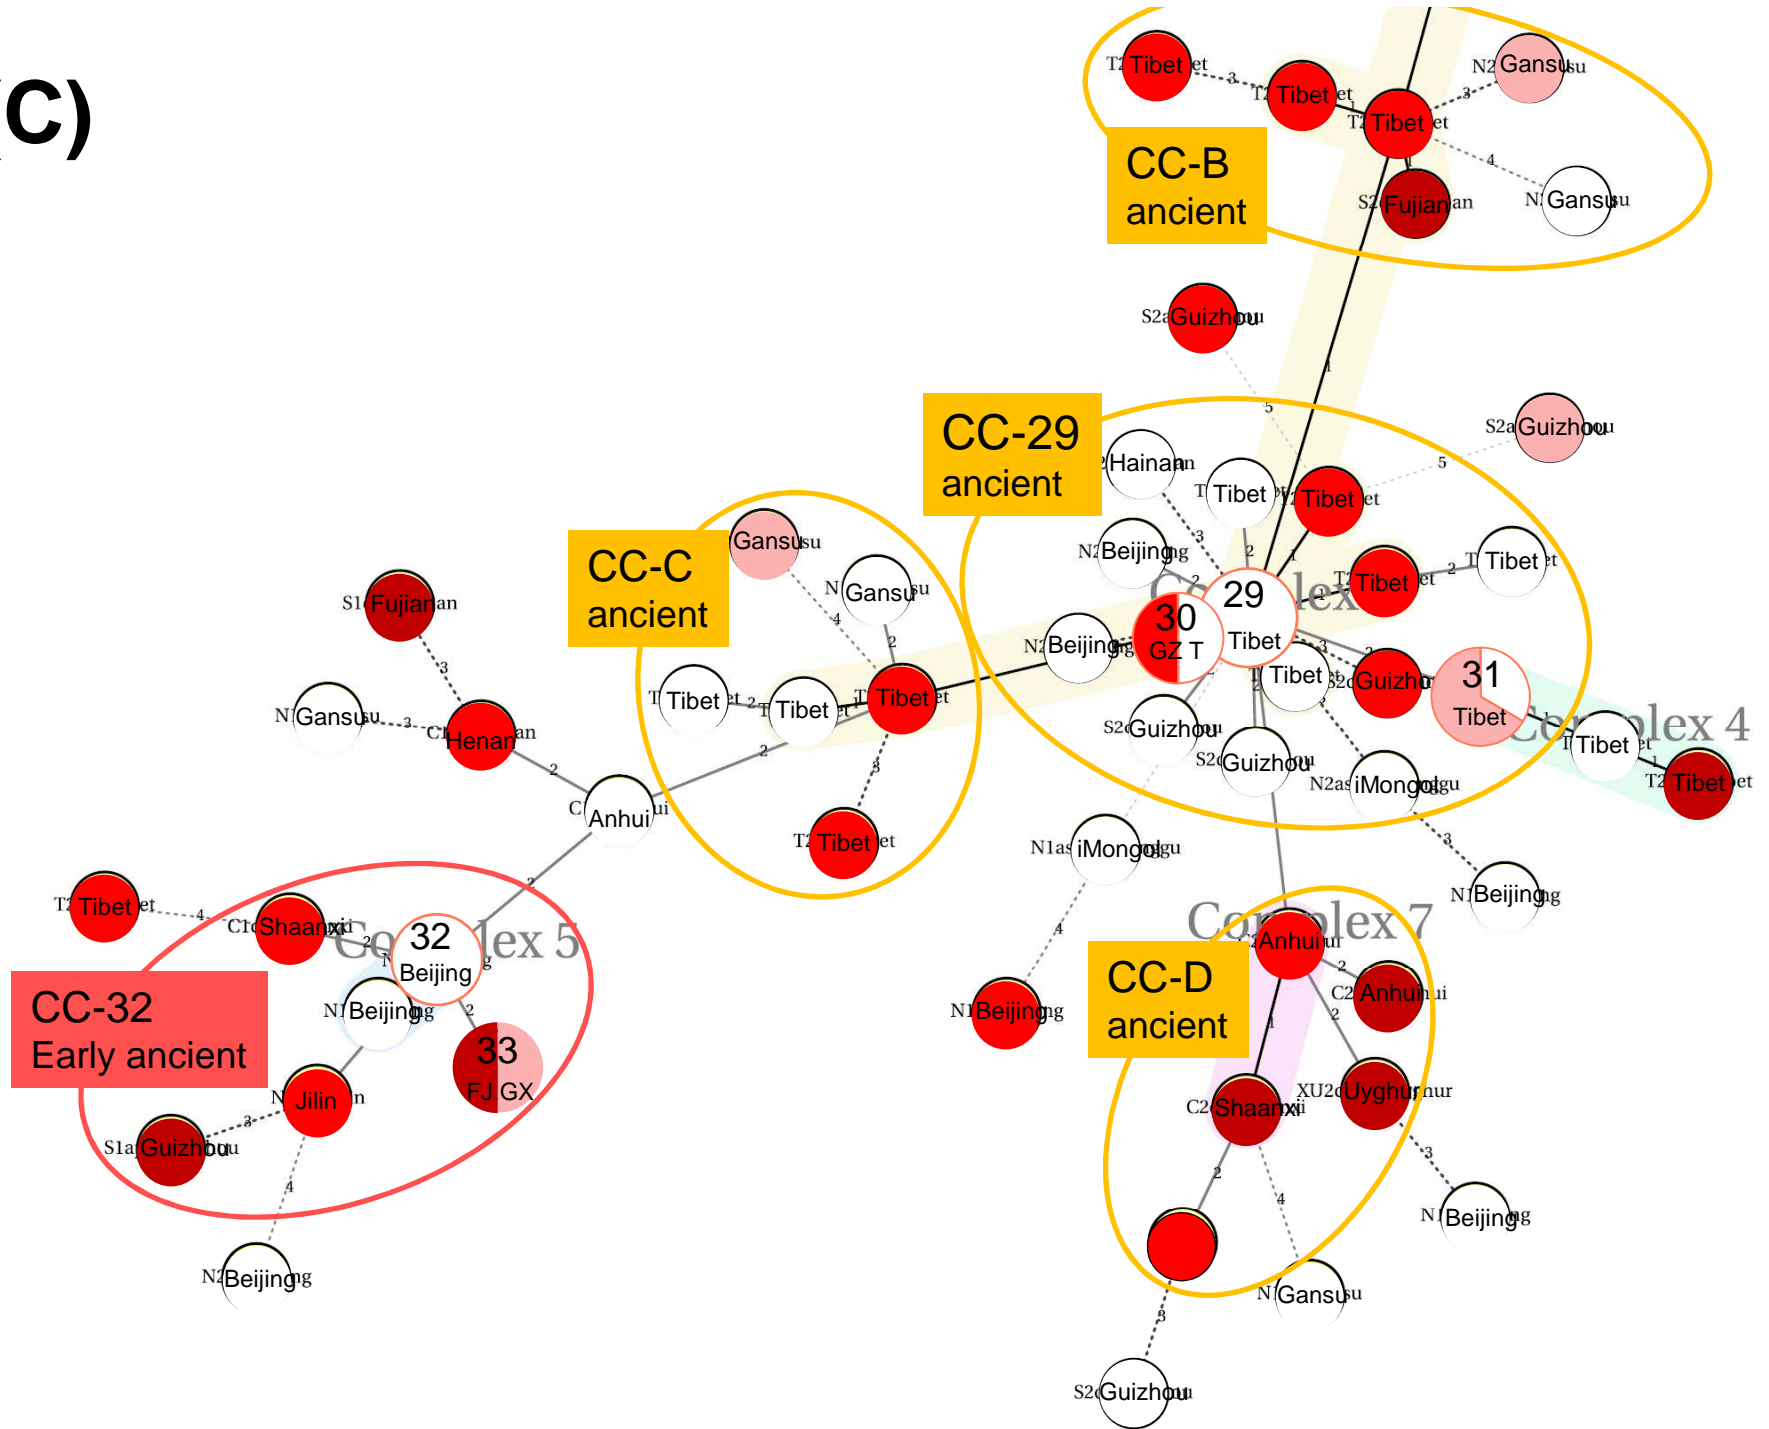

**Supplementary Figure S5.** UPGMA dendrogram of 24-MIRU-VNTR profiles of *M. tuberculosis* Beijing genotype isolates from adult TB patients in China.

Number code designates Beijing sublineages: 1 - early ancient, 2 - ancient, 3 - modern. *Mlva15-9* code was assigned by MIRU-VNTRplus.org. 24-loci order according to their order in genome.

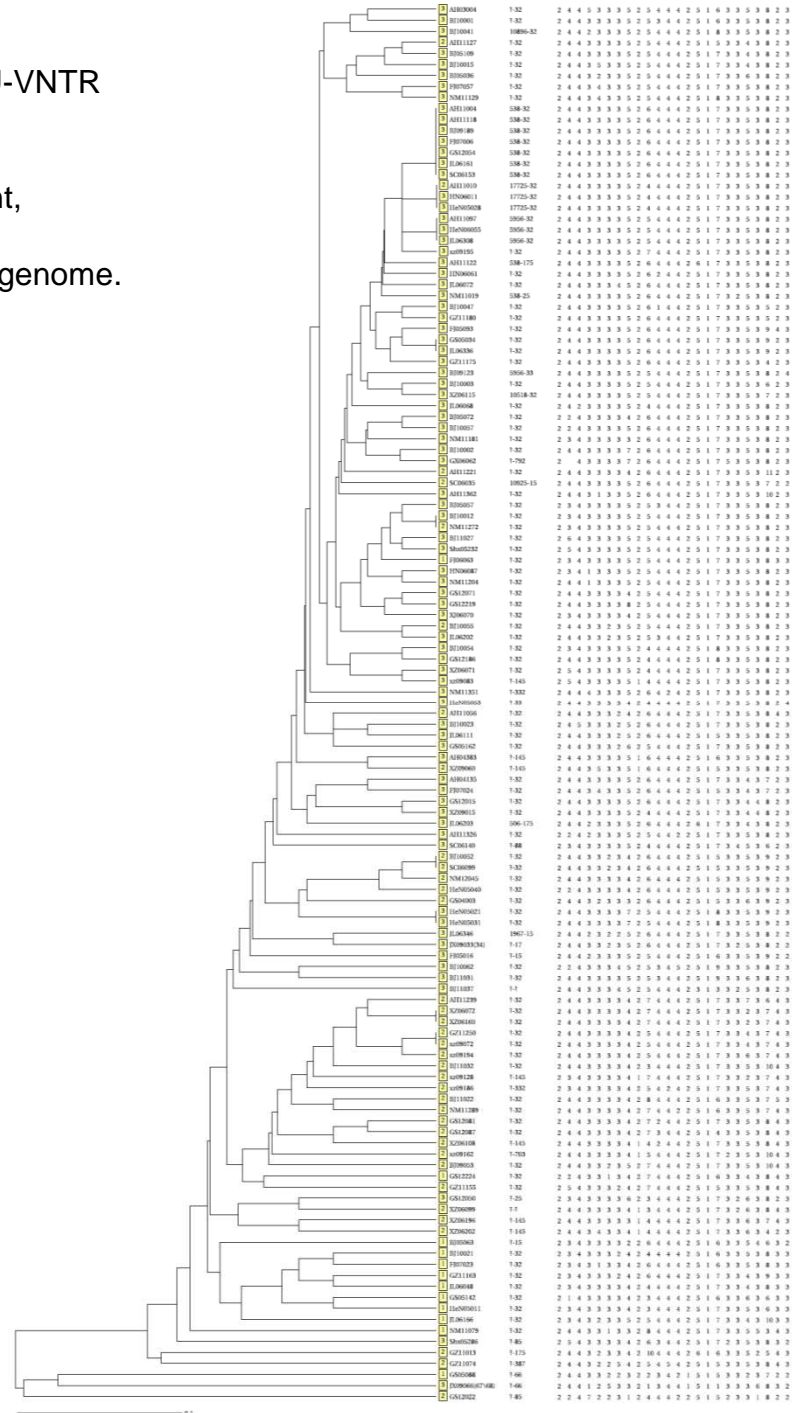

**Supplementary Figure S6.** UPGMA dendrogram of 24-MIRU-VNTR profiles of *M. tuberculosis* Beijing genotype isolates from children TB patients in China. Number code designates Beijing sublineages: 1 - early ancient, 2 - ancient, 3 - modern. *Mlva15-9* code was assigned by MIRU-VNTRplus.org. 24-loci order according to their order in genome.

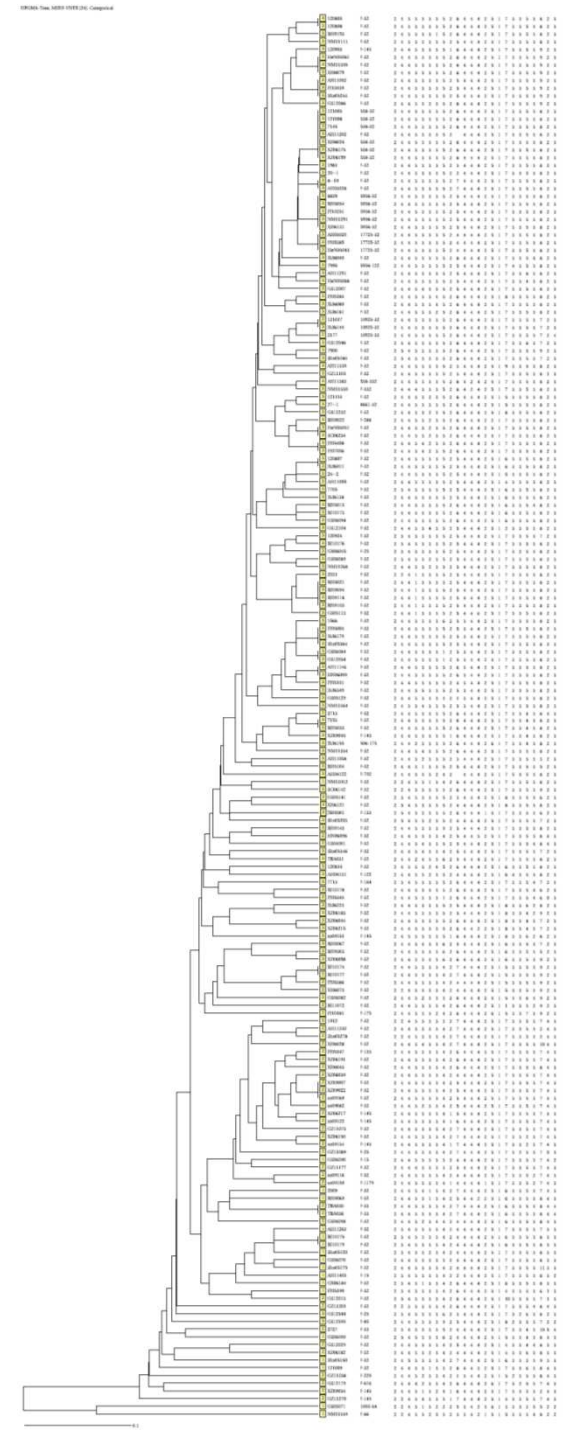

Supplement: srep34353-s2.pdf [file srep34353-s2.pdf]
